# Supplementary material
Source: publisher figshare collection journal article supplement (https://acs.figshare.com/ndownloader/files/5338450)
Supplement: Supplementary file 1 [file 5338450]

 
data_mw7181 
 
_audit_creation_method            SHELXL-97 
_chemical_name_systematic 
; 
 ? 
; 
_chemical_name_common             ? 
_chemical_melting_point           ? 
_chemical_formula_moiety          ? 
_chemical_formula_sum 
 'C20 H21 N O3 S' 
_chemical_formula_weight          355.44 
 
loop_ 
 _atom_type_symbol 
 _atom_type_description 
 _atom_type_scat_dispersion_real 
 _atom_type_scat_dispersion_imag 
 _atom_type_scat_source 
 'C'  'C'   0.0033   0.0016 
 'International Tables Vol C Tables 4.2.6.8 and 6.1.1.4' 
 'H'  'H'   0.0000   0.0000 
 'International Tables Vol C Tables 4.2.6.8 and 6.1.1.4' 
 'N'  'N'   0.0061   0.0033 
 'International Tables Vol C Tables 4.2.6.8 and 6.1.1.4' 
 'O'  'O'   0.0106   0.0060 
 'International Tables Vol C Tables 4.2.6.8 and 6.1.1.4' 
 'S'  'S'   0.1246   0.1234 
 'International Tables Vol C Tables 4.2.6.8 and 6.1.1.4' 
 
_symmetry_cell_setting            ? 
_symmetry_space_group_name_H-M    ? 
 
loop_ 
 _symmetry_equiv_pos_as_xyz 
 'x, y, z' 
 '-x+1/2, y+1/2, -z+1/2' 
 '-x, -y, -z' 
 'x-1/2, -y-1/2, z-1/2' 
 
_cell_length_a                    5.6851(4) 
_cell_length_b                    18.5378(17) 
_cell_length_c                    16.8750(12) 
_cell_angle_alpha                 90.00 
_cell_angle_beta                  96.864(7) 
_cell_angle_gamma                 90.00 
_cell_volume                      1765.7(2) 
_cell_formula_units_Z             4 
_cell_measurement_temperature     173(2) 
_cell_measurement_reflns_used     ? 
_cell_measurement_theta_min       ? 
_cell_measurement_theta_max       ? 
 
_exptl_crystal_description        ? 
_exptl_crystal_colour             ? 
_exptl_crystal_size_max           ? 
_exptl_crystal_size_mid           ? 
_exptl_crystal_size_min           ? 
_exptl_crystal_density_meas       ? 
_exptl_crystal_density_diffrn     1.337 
_exptl_crystal_density_method     'not measured' 
_exptl_crystal_F_000              752 
_exptl_absorpt_coefficient_mu     0.202 
_exptl_absorpt_correction_type    ? 
_exptl_absorpt_correction_T_min   ? 
_exptl_absorpt_correction_T_max   ? 
_exptl_absorpt_process_details    ? 
 
_exptl_special_details 
; 
 ? 
; 
 
_diffrn_ambient_temperature       173(2) 
_diffrn_radiation_wavelength      0.71073 
_diffrn_radiation_type            MoK\a 
_diffrn_radiation_source          'fine-focus sealed tube' 
_diffrn_radiation_monochromator   graphite 
_diffrn_measurement_device_type   ? 
_diffrn_measurement_method        ? 
_diffrn_detector_area_resol_mean  ? 
_diffrn_standards_number          ? 
_diffrn_standards_interval_count  ? 
_diffrn_standards_interval_time   ? 
_diffrn_standards_decay_%         ? 
_diffrn_reflns_number             4812 
_diffrn_reflns_av_R_equivalents   0.0178 
_diffrn_reflns_av_sigmaI/netI     0.0479 
_diffrn_reflns_limit_h_min        -6 
_diffrn_reflns_limit_h_max        7 
_diffrn_reflns_limit_k_min        -28 
_diffrn_reflns_limit_k_max        3 
_diffrn_reflns_limit_l_min        -24 
_diffrn_reflns_limit_l_max        11 
_diffrn_reflns_theta_min          1.64 
_diffrn_reflns_theta_max          32.60 
_reflns_number_total              3937 
_reflns_number_gt                 2824 
_reflns_threshold_expression      >2sigma(I) 
 
_computing_data_collection        ? 
_computing_cell_refinement        ? 
_computing_data_reduction         ? 
_computing_structure_solution     'SHELXS-97 (Sheldrick, 1990)' 
_computing_structure_refinement   'SHELXL-97 (Sheldrick, 1997)' 
_computing_molecular_graphics     ? 
_computing_publication_material   ? 
 
_refine_special_details 
; 
 Refinement of F^2^ against ALL reflections.  The weighted R-factor wR and 
 goodness of fit S are based on F^2^, conventional R-factors R are based 
 on F, with F set to zero for negative F^2^. The threshold expression of 
 F^2^ > 2sigma(F^2^) is used only for calculating R-factors(gt) etc. and is 
 not relevant to the choice of reflections for refinement.  R-factors based 
 on F^2^ are statistically about twice as large as those based on F, and R- 
 factors based on ALL data will be even larger. 
; 
 
_refine_ls_structure_factor_coef  Fsqd  
_refine_ls_matrix_type            full 
_refine_ls_weighting_scheme       calc  
_refine_ls_weighting_details 
 'calc w=1/[\s^2^(Fo^2^)+(0.1733P)^2^+0.0000P] where P=(Fo^2^+2Fc^2^)/3' 
_atom_sites_solution_primary      direct 
_atom_sites_solution_secondary    difmap 
_atom_sites_solution_hydrogens    geom 
_refine_ls_hydrogen_treatment     mixed 
_refine_ls_extinction_method      none 
_refine_ls_extinction_coef        ? 
_refine_ls_number_reflns          3937 
_refine_ls_number_parameters      227 
_refine_ls_number_restraints      0 
_refine_ls_R_factor_all           0.0598 
_refine_ls_R_factor_gt            0.0449 
_refine_ls_wR_factor_ref          0.1482 
_refine_ls_wR_factor_gt           0.1298 
_refine_ls_goodness_of_fit_ref    0.593 
_refine_ls_restrained_S_all       0.593 
_refine_ls_shift/su_max           0.056 
_refine_ls_shift/su_mean          0.001 
 
loop_ 
 _atom_site_label 
 _atom_site_type_symbol 
 _atom_site_fract_x 
 _atom_site_fract_y 
 _atom_site_fract_z 
 _atom_site_U_iso_or_equiv 
 _atom_site_adp_type 
 _atom_site_occupancy 
 _atom_site_symmetry_multiplicity 
 _atom_site_calc_flag 
 _atom_site_refinement_flags 
 _atom_site_disorder_assembly 
 _atom_site_disorder_group 
S1 S 0.11874(8) 1.028469(17) 0.69674(3) 0.02702(15) Uani 1 1 d . . . 
O1 O -0.1362(3) 0.81360(6) 0.64739(9) 0.0361(3) Uani 1 1 d . . . 
O2 O 0.1397(3) 1.07471(6) 0.62990(8) 0.0387(4) Uani 1 1 d . . . 
O3 O -0.1080(2) 1.01337(6) 0.72078(10) 0.0412(4) Uani 1 1 d . . . 
N1 N 0.2399(3) 0.95213(6) 0.67713(9) 0.0236(3) Uani 1 1 d . . . 
C1 C 0.1729(3) 0.88537(7) 0.71586(10) 0.0235(4) Uani 1 1 d . . . 
H1 H 0.0434 0.8978 0.7487 0.028 Uiso 1 1 calc R . . 
C2 C 0.0699(3) 0.83075(7) 0.65148(10) 0.0245(4) Uani 1 1 d . . . 
C3 C 0.2320(4) 0.80313(7) 0.59384(11) 0.0274(4) Uani 1 1 d . . . 
H3A H 0.1838 0.7540 0.5754 0.033 Uiso 1 1 calc R . . 
H3B H 0.3974 0.8012 0.6199 0.033 Uiso 1 1 calc R . . 
C4 C 0.2122(4) 0.85537(8) 0.52334(11) 0.0292(4) Uani 1 1 d . . . 
H4 H 0.0644 0.8516 0.4850 0.035 Uiso 1 1 calc R . . 
C5 C 0.4321(4) 0.87813(8) 0.48803(12) 0.0350(5) Uani 1 1 d . . . 
H5A H 0.4182 0.8867 0.4297 0.042 Uiso 1 1 calc R . . 
H5B H 0.5854 0.8575 0.5115 0.042 Uiso 1 1 calc R . . 
C6 C 0.3101(3) 0.93050(7) 0.53812(10) 0.0276(4) Uani 1 1 d . . . 
H6 H 0.2187 0.9699 0.5080 0.033 Uiso 1 1 calc R . . 
C7 C 0.4188(3) 0.94957(7) 0.62079(10) 0.0236(4) Uani 1 1 d . . . 
H7A H 0.5411 0.9134 0.6394 0.028 Uiso 1 1 calc R . . 
H7B H 0.4974 0.9972 0.6198 0.028 Uiso 1 1 calc R . . 
C8 C 0.4845(3) 1.10924(8) 0.76860(12) 0.0295(4) Uani 1 1 d . . . 
H8 H 0.5189 1.1201 0.7162 0.035 Uiso 1 1 calc R . . 
C9 C 0.6273(4) 1.13604(9) 0.83448(14) 0.0366(5) Uani 1 1 d . . . 
H9 H 0.7586 1.1658 0.8266 0.044 Uiso 1 1 calc R . . 
C10 C 0.5819(4) 1.12021(10) 0.91161(14) 0.0402(5) Uani 1 1 d . . . 
C11 C 0.3864(5) 1.07801(10) 0.92137(13) 0.0437(6) Uani 1 1 d . . . 
H11 H 0.3515 1.0673 0.9738 0.052 Uiso 1 1 calc R . . 
C12 C 0.2405(4) 1.05100(9) 0.85645(12) 0.0355(5) Uani 1 1 d . . . 
H12 H 0.1070 1.0222 0.8643 0.043 Uiso 1 1 calc R . . 
C13 C 0.2913(3) 1.06646(7) 0.77994(10) 0.0252(4) Uani 1 1 d . . . 
C14 C 0.7403(5) 1.14993(15) 0.98171(18) 0.0635(8) Uani 1 1 d . . . 
H14A H 0.7381 1.2028 0.9796 0.095 Uiso 1 1 calc R . . 
H14B H 0.9025 1.1327 0.9799 0.095 Uiso 1 1 calc R . . 
H14C H 0.6836 1.1337 1.0314 0.095 Uiso 1 1 calc R . . 
C15 C 0.5656(3) 0.89298(7) 0.80638(10) 0.0257(4) Uani 1 1 d . . . 
H15 H 0.5746 0.9429 0.7943 0.031 Uiso 1 1 calc R . . 
C16 C 0.7427(4) 0.86134(8) 0.85805(11) 0.0320(4) Uani 1 1 d . . . 
H16 H 0.8724 0.8896 0.8812 0.038 Uiso 1 1 calc R . . 
C17 C 0.7325(4) 0.78853(9) 0.87641(12) 0.0391(5) Uani 1 1 d . . . 
H17 H 0.8546 0.7668 0.9119 0.047 Uiso 1 1 calc R . . 
C18 C 0.5426(4) 0.74794(9) 0.84248(13) 0.0419(5) Uani 1 1 d . . . 
H18 H 0.5345 0.6980 0.8546 0.050 Uiso 1 1 calc R . . 
C19 C 0.3651(4) 0.77932(8) 0.79125(12) 0.0354(5) Uani 1 1 d . . . 
H19 H 0.2347 0.7509 0.7689 0.043 Uiso 1 1 calc R . . 
C20 C 0.3740(3) 0.85236(7) 0.77171(10) 0.0243(4) Uani 1 1 d . . . 
 
loop_ 
 _atom_site_aniso_label 
 _atom_site_aniso_U_11 
 _atom_site_aniso_U_22 
 _atom_site_aniso_U_33 
 _atom_site_aniso_U_23 
 _atom_site_aniso_U_13 
 _atom_site_aniso_U_12 
S1 0.0259(3) 0.02353(18) 0.0295(3) -0.00498(12) -0.0054(2) 0.00478(12) 
O1 0.0257(9) 0.0373(6) 0.0441(9) -0.0031(5) -0.0007(8) -0.0069(4) 
O2 0.0554(11) 0.0267(5) 0.0306(7) 0.0017(4) -0.0092(7) 0.0105(5) 
O3 0.0238(9) 0.0401(6) 0.0587(11) -0.0160(6) 0.0003(8) 0.0038(5) 
N1 0.0278(9) 0.0197(5) 0.0235(7) -0.0016(4) 0.0041(7) 0.0017(4) 
C1 0.0241(10) 0.0241(6) 0.0220(8) -0.0017(5) 0.0014(8) -0.0028(5) 
C2 0.0241(10) 0.0221(6) 0.0260(8) 0.0019(5) -0.0026(8) -0.0025(5) 
C3 0.0315(11) 0.0226(6) 0.0275(9) -0.0025(5) 0.0012(9) -0.0035(5) 
C4 0.0345(12) 0.0289(7) 0.0226(8) -0.0027(5) -0.0034(9) -0.0040(6) 
C5 0.0465(14) 0.0330(7) 0.0273(10) -0.0036(6) 0.0120(11) -0.0039(6) 
C6 0.0354(12) 0.0245(6) 0.0219(8) 0.0006(5) 0.0001(9) 0.0000(5) 
C7 0.0253(10) 0.0217(6) 0.0229(8) -0.0003(5) -0.0006(8) -0.0019(5) 
C8 0.0298(12) 0.0279(7) 0.0311(10) -0.0056(6) 0.0044(9) 0.0014(6) 
C9 0.0270(12) 0.0363(8) 0.0454(13) -0.0138(7) -0.0001(11) 0.0005(6) 
C10 0.0347(14) 0.0442(9) 0.0375(12) -0.0164(7) -0.0127(11) 0.0150(7) 
C11 0.0556(18) 0.0483(10) 0.0261(10) -0.0047(7) 0.0000(12) 0.0098(9) 
C12 0.0413(14) 0.0355(8) 0.0302(10) -0.0029(6) 0.0068(11) -0.0005(7) 
C13 0.0262(11) 0.0225(6) 0.0259(8) -0.0049(5) -0.0018(8) 0.0045(5) 
C14 0.052(2) 0.0817(16) 0.0498(16) -0.0316(12) -0.0234(15) 0.0179(12) 
C15 0.0267(11) 0.0259(6) 0.0235(8) 0.0007(5) -0.0009(8) -0.0015(5) 
C16 0.0326(12) 0.0351(8) 0.0264(9) 0.0030(6) -0.0049(9) -0.0023(6) 
C17 0.0478(15) 0.0365(8) 0.0298(10) 0.0098(6) -0.0079(11) 0.0024(7) 
C18 0.0600(16) 0.0268(7) 0.0349(10) 0.0087(6) -0.0112(11) -0.0042(7) 
C19 0.0457(14) 0.0277(7) 0.0300(10) 0.0043(6) -0.0075(10) -0.0096(6) 
C20 0.0272(11) 0.0261(6) 0.0191(8) 0.0006(5) 0.0009(8) -0.0021(5) 
 
_geom_special_details 
; 
 All esds (except the esd in the dihedral angle between two l.s. planes) 
 are estimated using the full covariance matrix.  The cell esds are taken 
 into account individually in the estimation of esds in distances, angles 
 and torsion angles; correlations between esds in cell parameters are only 
 used when they are defined by crystal symmetry.  An approximate (isotropic) 
 treatment of cell esds is used for estimating esds involving l.s. planes. 
; 
 
loop_ 
 _geom_bond_atom_site_label_1 
 _geom_bond_atom_site_label_2 
 _geom_bond_distance 
 _geom_bond_site_symmetry_2 
 _geom_bond_publ_flag 
S1 O3 1.4246(14) . ? 
S1 O2 1.4329(13) . ? 
S1 N1 1.6251(12) . ? 
S1 C13 1.7610(18) . ? 
O1 C2 1.208(2) . ? 
N1 C1 1.4709(18) . ? 
N1 C7 1.474(2) . ? 
C1 C20 1.521(2) . ? 
C1 C2 1.548(2) . ? 
C2 C3 1.507(2) . ? 
C3 C4 1.528(2) . ? 
C4 C5 1.508(3) . ? 
C4 C6 1.509(2) . ? 
C5 C6 1.509(2) . ? 
C6 C7 1.499(2) . ? 
C8 C13 1.386(2) . ? 
C8 C9 1.388(3) . ? 
C9 C10 1.388(3) . ? 
C10 C11 1.385(3) . ? 
C10 C14 1.503(3) . ? 
C11 C12 1.386(3) . ? 
C12 C13 1.386(3) . ? 
C15 C16 1.381(3) . ? 
C15 C20 1.394(2) . ? 
C16 C17 1.388(2) . ? 
C17 C18 1.383(3) . ? 
C18 C19 1.377(3) . ? 
C19 C20 1.396(2) . ? 
 
loop_ 
 _geom_angle_atom_site_label_1 
 _geom_angle_atom_site_label_2 
 _geom_angle_atom_site_label_3 
 _geom_angle 
 _geom_angle_site_symmetry_1 
 _geom_angle_site_symmetry_3 
 _geom_angle_publ_flag 
O3 S1 O2 120.33(10) . . ? 
O3 S1 N1 107.86(7) . . ? 
O2 S1 N1 106.47(7) . . ? 
O3 S1 C13 106.76(9) . . ? 
O2 S1 C13 107.31(8) . . ? 
N1 S1 C13 107.54(8) . . ? 
C1 N1 C7 119.67(11) . . ? 
C1 N1 S1 120.25(11) . . ? 
C7 N1 S1 120.09(9) . . ? 
N1 C1 C20 113.49(13) . . ? 
N1 C1 C2 109.56(13) . . ? 
C20 C1 C2 111.42(12) . . ? 
O1 C2 C3 122.51(16) . . ? 
O1 C2 C1 119.69(15) . . ? 
C3 C2 C1 117.76(15) . . ? 
C2 C3 C4 107.07(13) . . ? 
C5 C4 C6 60.03(11) . . ? 
C5 C4 C3 119.86(18) . . ? 
C6 C4 C3 117.70(15) . . ? 
C4 C5 C6 60.04(11) . . ? 
C7 C6 C4 118.31(13) . . ? 
C7 C6 C5 120.48(17) . . ? 
C4 C6 C5 59.93(11) . . ? 
N1 C7 C6 111.64(15) . . ? 
C13 C8 C9 119.43(17) . . ? 
C8 C9 C10 121.28(19) . . ? 
C11 C10 C9 118.2(2) . . ? 
C11 C10 C14 121.8(2) . . ? 
C9 C10 C14 120.0(2) . . ? 
C12 C11 C10 121.53(19) . . ? 
C11 C12 C13 119.32(19) . . ? 
C8 C13 C12 120.24(18) . . ? 
C8 C13 S1 119.59(13) . . ? 
C12 C13 S1 120.10(14) . . ? 
C16 C15 C20 120.64(14) . . ? 
C15 C16 C17 120.49(18) . . ? 
C16 C17 C18 119.22(19) . . ? 
C19 C18 C17 120.50(15) . . ? 
C18 C19 C20 120.90(17) . . ? 
C15 C20 C19 118.25(17) . . ? 
C15 C20 C1 122.33(13) . . ? 
C19 C20 C1 119.40(15) . . ? 
 
_diffrn_measured_fraction_theta_max    0.611 
_diffrn_reflns_theta_full              32.60 
_diffrn_measured_fraction_theta_full   0.611 
_refine_diff_density_max    0.326 
_refine_diff_density_min   -0.244 
_refine_diff_density_rms    0.052 
